1     **Altered functional connectivity relates to motor performance**  
2                     **deficits in bipolar but not unipolar depression**

3

4     Lara E. Marten<sup>a</sup>, Aditya Singh<sup>a</sup>, Anna M. Muellen<sup>b</sup>, Sören M. Noack<sup>a</sup>, Vladislav Kozyrev<sup>a,c,d</sup>,  
5                     Renate Schweizer<sup>c,e</sup>, Roberto Goya-Maldonado<sup>a,e</sup>

6     **Author affiliations:**

7     a Laboratory of Systems Neuroscience and Imaging in Psychiatry (SNIP-Lab), Department of  
8     Psychiatry and Psychotherapy, University Medical Center Göttingen (UMG), Von-Siebold-  
9     Straße 5, 37075 Göttingen, Germany

10    b Cognitive Neuroscience Laboratory, German Primate Center, Kellnerweg 4, 37077  
11    Göttingen, Germany

12    c Functional Imaging Laboratory, German Primate Center, Kellnerweg 4, 37077 Göttingen,  
13    Germany

14    d Institute of Molecular and Clinical Ophthalmology Basel, Mittlere Straße 91, 4056 Basel,  
15    Switzerland

16    e Leibniz ScienceCampus Primate Cognition, Kellnerweg 4, 37077 Göttingen, Germany

17

18    **Correspondence to:**

19    PD Dr. med. Roberto Goya-Maldonado

20    Universitätsmedizin Göttingen

21    Klinik für Psychiatrie und Psychotherapie

22    Labor für systemische Neurowissenschaften und Bildgebung in der Psychiatrie (SNIP-Lab)

23    Von-Siebold-Str. 5

24    D-37075 Göttingen

25    Germany

26    Phone: +49 551-39-22244

27    E-mail: [roberto.goya@med.uni-goettingen.de](mailto:roberto.goya@med.uni-goettingen.de)

28

## 29 **Abstract**

30 Underpinnings of psychomotor deficits in bipolar and unipolar depression remain  
31 underexplored. Here, we hypothesize that motor performance deficits in patients may be  
32 partially explained by altered functional connectivities between hand primary motor cortex  
33 and posterior cingulate cortex with supplementary motor area.

34 95 participants between 18-65 years of age, including bipolar depressed, unipolar depressed,  
35 and sex-, age-, and education-matched healthy controls, participated in this observational  
36 study with two separate visits about five weeks apart, during which the patients received  
37 psychopharmacological treatment. Motor performance was measured with a finger-tapping-  
38 task and related to functional connectivity from individual seeds in hand primary motor  
39 cortex and posterior cingulate cortex as well as to the default mode and sensory motor  
40 networks from resting state functional MRI data.

41 79 participants (45.6% females, 21 bipolar depressed, 27 unipolar depressed and 31 healthy  
42 controls) were included in the analysis. Using a finger-tapping-task, the groups differed in  
43 motor performance (ANOVA factor “group”  $F(2,76) = 4.122$ ;  $p = 0.020$ ) and bipolar  
44 depressed but not unipolar depressed showed performance deficits compared to controls  
45 (post-hoc-test  $p = 0.023$  and  $p = 0.158$  respectively). Behavioral performance correlated with  
46 functional coupling of posterior cingulate cortex - supplementary motor area, but not with  
47 coupling of primary motor cortex - supplementary motor area at cluster-wise correction level  
48  $p FWEc < 0.05$ . Correlation differences were seen in posterior cingulate cortex -  
49 supplementary motor area (healthy controls>bipolar depressed, unipolar depressed>bipolar  
50 depressed) at second visit and in primary motor cortex - supplementary motor area (bipolar  
51 depressed>unipolar depressed) at both visits at cluster-wise correction level  $p FWEc < 0.05$ .  
52 Motor performance did not relate to functional coupling of sensory motor network - anterior  
53 (visit 1  $p = 0.375$ , visit 2  $p = 0.700$ ) or - posterior (visit 1  $p = 0.903$ , visit 2  $p = 0.772$ )  
54 default mode network.

55 Motor performance deficits were seen exclusively in bipolar depressed and related to reduced  
56 posterior cingulate cortex - supplementary motor area functional connectivity at rest. Our  
57 results shed new light on a possible disruption in the anticorrelation between these regions,  
58 which seems fundamental for the preservation of motor skills. Given that nuisance factors  
59 were controlled for in the study, it is unlikely that the main results are biased by lefthanders,  
60 medication load, seed volumes, or differences in movements during MRI scanning. If these

61 findings are confirmed, new targeted non-invasive interventions, such as repetitive  
62 transcranial magnetic stimulation, may be more effective against psychomotor deficits in  
63 bipolar depression, when aimed at modulating the supplementary motor area.

64 **Keywords:** bipolar disorder; major depressive disorder; finger tapping; posterior cingulate  
65 cortex; supplementary motor area

66 **Abbreviations**<sup>1</sup>

## 67 **1. Introduction**

68 Psychomotor functioning involves processes that range from planning, initiating and  
69 executing movements.<sup>1,for review see 2</sup> Slower or inefficient information processing may derive  
70 from alterations in particular neural regions, or entire networks, that are essential to the  
71 circuitry.<sup>3-7</sup> The precentral gyrus contains the primary motor cortex (M1), which is in charge  
72 of starting the execution loop of movements of the contralateral limb.<sup>8,9</sup> For the coordinated  
73 adjustment of muscles implicated in the intended hand movement, the supplementary motor  
74 area (SMA) integrates signals of frontal planning with sensorial, proprioceptive and cognitive  
75 information from other brain regions and forwards it to the M1.<sup>8-10,for a review see 11</sup> Another  
76 pivotal region involved in successful motor responses is the posterior cingulate cortex (PCC),  
77 a region belonging to the default mode network (DMN). PCC plays a role in integrating  
78 signals from somatosensory areas and dorsal visual stream via parietal cortical areas for  
79 spatial processing and action in space.<sup>for review see 12</sup> In stroke patients with impairments in  
80 motor performance, strengthened resting state functional connectivity between the M1 and  
81 the PCC was found to be critical for improvements in motor performance.<sup>17</sup> Studies have  
82 shown that the PCC is also involved in emotional processing and rumination of negative  
83 thoughts.<sup>13-16</sup> This makes it an interesting target for research on depression, since  
84 psychomotor symptoms in neuropsychiatric disorders may involve behaviors arising from

---

<sup>1</sup> **Abbreviations:** AAL = automated anatomical labeling; BD = Bipolar depressed; BDI-II = Beck-Depression-Rating-Scale second version; DMN = Default mode network; EPI = Echo planar imaging; FTT = Finger-tapping-task; gICA = group independent component analysis; GLM = general linear model; FWHM = full width at half maximum; HAMD = Hamilton depression rating scale; HC = Healthy controls; ICD-10 = International Statistical Classification of Diseases and Related Health Problems 10th Revision; M1 = Primary motor cortex; MADRS = Montgomery Åsberg Depression Rating Scale; MNI = Montreal Neurological Institute; MPRAGE = magnetization prepared rapid gradient echo; PCC = Posterior cingulate cortex; p FWE = family-wise error correction level; p FWEc = cluster-wise correction level; rmANOVA = repeated measures ANOVA; rs-fMRI = Resting state functional MRI; SCL-90-R = Symptom-Checklist-90-R; SMA = Supplementary motor area; SMN = Sensory motor network; UD = Unipolar depressed; UMG = University Medical Center Göttingen; YMRS = Young-Mania-Rating-Scale

85 more than just the motor circuitry.<sup>for review see 6</sup> To broaden the understanding of the  
86 contribution of M1 and PCC also in motor performance deficits in depression,<sup>18-21</sup> studies  
87 that unveil their longitudinal functional connectivity are crucial.

88 Deficits in psychomotor functioning is a typical symptom cluster of major depressive disorder  
89 and the depressive phase of bipolar disorder<sup>22,23</sup> and can make a decisive contribution to  
90 unsuccessful treatment<sup>24,25</sup> as well as to social functioning.<sup>26</sup> In spite of their impact on  
91 patient outcomes, their manifestation is often assumed to be either part to residual symptoms  
92 or medication side effects, leaving their neural correlates and development of potentially  
93 targeted treatments poorly explored. The identification of more objective differences  
94 involving motor performance and its neural correlates in groups of bipolar depressed (BD),  
95 unipolar depressed (UD) patients and healthy controls (HC) could support the development of  
96 novel biomarkers. Furthermore, such neurofunctional biomarkers of BD and UD can offer the  
97 chance to better understand the basis of motor symptom manifestation and treatment  
98 improvement,<sup>for review see 27</sup> for example, by applying more targeted transcranial magnetic  
99 stimulation (TMS) protocols.<sup>for review see 28</sup>

100 Different paradigms can be used to assess and compare the motor performance of UD, BD,  
101 HC and recovered patients.<sup>29-34</sup> In the present study, we have chosen the finger-tapping-task  
102 (FTT) paradigm, considering that it dismisses working memory,<sup>35,36</sup> which allows clearer  
103 conclusions about the movement process itself. It has been previously shown that motor  
104 performance in FTT is impaired in BD,<sup>18,19</sup> but not always in UD,<sup>5,20,21,37-39</sup>. This reinforces  
105 an importance of understanding the underlying brain mechanisms leading to such differences.  
106 In light of possible residual motor symptoms,<sup>40,41</sup> the fundamental evaluation of motor  
107 performance, e.g. using the FTT, related to baseline M1 and PCC functional connectivity in  
108 depressed subjects undergoing treatment remains unexplored to our knowledge. Therefore,  
109 our aim with this study was to test whether resting state functional connectivity of M1 and  
110 PCC with SMA, which is accessible on the MRI scanner to all patients, regardless of how  
111 severely depressed they are, can explain behavioral differences in subjects. Functional  
112 connectivity between the right M1 and the SMA, an integrative center of the sensory motor  
113 network (SMN), can be a positive predictor of performance during the FTT in HC.<sup>42</sup> Thus,  
114 baseline functional dysconnectivities with the SMA could potentially explain behavioral  
115 differences between BD and UD patients in contrast to HC.

116 Large-scale networks can differ according to mood states in bipolar disorder.<sup>43-45</sup> A model  
117 involving the interaction between the SMN and the DMN has been recently suggested to  
118 explain psychomotor deficits in affective and many other disorders.<sup>for review see 6</sup> In BD, it was  
119 proposed that the interaction between networks is imbalanced towards the DMN in  
120 depressive states, whereas imbalanced towards the SMN in manic states.<sup>43,46</sup> While this  
121 remains to be tested, evidence of hyperconnectivity between the SMN and the DMN in  
122 bipolar patients in a depressed state seems to contradict this idea.<sup>44</sup> As the balanced coupling  
123 between task positive and task negative networks is important for the proper execution of  
124 motor tasks in HC,<sup>47</sup> we explore here whether the relationship between SMN-DMN networks  
125 can better explain possible FTT differences between groups.

126 Thus, in the present investigation, we expect that FTT motor performance is impaired in BD  
127 and UD in relation to HC, a difference that could decrease after antidepressant treatment. We  
128 hypothesize that the functional connectivity of M1 and PCC (our regions of interest for the  
129 seed analysis) with the SMA relates to FTT motor performance. Finally, we explore if the  
130 cross-correlation between the entire SMN and DMN (rather than the regions of interest)  
131 better explains differences in the level of motor performance.

132

## 133 **2. Materials and methods**

### 134 **2.1 Protocol**

135 The study was performed at the University Medical Center Göttingen (UMG) after approval  
136 of the research protocol by the local Ethics Committee. All participants provided their verbal  
137 and written informed consent after a detailed explanation of the research protocol. Patients  
138 experiencing a depressive phase of major depressive disorder (UD) or bipolar disorder (BD)  
139 (cf. ICD-10) and sex, age and education matched HC were recruited by announcements at the  
140 local University, the UMG Psychiatric Center as well as the local Asklepios Psychiatric  
141 Hospital.

142 All participants were between 18 and 65 years old. Exclusion criteria were: current or  
143 previous brain injury, current or past neurological disease, current use of illegal drugs,  
144 inability to perform the tasks or to undergo MRI sessions.

145 We collected individual information about the handedness<sup>48</sup> and being lefthanded was not an  
146 exclusion criterion in order to consider all the handedness variability in the clinical sample.  
147 And to consider the influence of this variable, we also complement the analyses with models  
148 excluding lefthanders.

149 The study comprised two assessments of two consecutive days separated by approximately 5  
150 weeks (Fig. 1). Between evaluations, patients received psychopharmacological treatment for  
151 the depressive episode at the psychiatric hospital by their caregiver physicians, who were  
152 independent in their treatment choices from the research group that conducted the study  
153 (naturalistic design). HC participated in the same study protocol, but received no treatment.  
154 All subjects were instructed to abstain from alcohol for at least 24 hours before and to refrain  
155 from consuming nicotine or caffeine for at least two hours before the assessments. On each  
156 day the participants performed the FTT, on the second day followed by a structured interview  
157 led by a trained person and – in case of medication with measurable blood metabolites  
158 (Supplementary Table 1) – a blood sample was taken immediately prior to the MRI session to  
159 measure their blood medication levels.

160 Severity of symptoms in patients was assessed with the Montgomery Åsberg Depression  
161 Rating Scale (MADRS), the Young-Mania-Rating-Scale (YMRS), and the Beck-Depression-  
162 Rating-Scale second version (BDI-II), the first two rated within the structured interview, the  
163 latter, self-rated. We used the BDI-II in all our groups as our primary scale to implement the  
164 degree of depressive symptomatology in the analyses. The BDI-II is well correlated with  
165 other-rated scales (MADRS, Hamilton depression rating scale (HAMD)) and has a focus on  
166 cognitive aspects of depression and less on mood and anxiety or neurovegetative aspects,<sup>49</sup>  
167 which is in line with the research focus of this study. Furthermore, the BDI-II as a self-rated  
168 scale showed more correlation to brain metabolism in resting state positron emission  
169 tomography than HAMD as an other-rated scale, indicating that BDI-II can be more strongly  
170 related to basal brain functioning.<sup>50</sup> To account for the amount of psychotropic medication  
171 used per patient, an extended concept previously established as medication load<sup>51-55</sup> was  
172 implemented (Supplementary material, chapter 1.1). In HC, to verify the absence of potential  
173 psychiatric symptoms, the self-rated Symptom-Checklist-90-R (SCL-90-R) was used.

## 174 **2.2 Finger-Tapping-Task**

175 The FTT was performed on a computer with an adapted keyboard that contained only the  
176 keys 1 to 4. The subjects tapped with the digits of the non-dominant hand not using the  
177 thumb. The task consisted of 12 intervals of 30 seconds duration in which the tapping was  
178 performed with intervals of 20 seconds without digit movements between them. The entire  
179 tapping sequence was presented on the computer monitor with numbers associated with  
180 digits: 1 = little finger, 2 = ring finger, 3 = middle finger, 4 = index finger. On the two days  
181 of the first visit the sequence “4-1-3-2-4” was used, on the two days of the second visit the  
182 sequence “1-4-2-3-1” was used (Fig. 1). The participants were instructed to press the keys as  
183 fast and accurately as possible. No feedback was given on the performance of the task. The  
184 mean from the number of correctly tapped sequences of the last three of the 12 tapping  
185 intervals of the first days of the visits were used as a score to quantify the motor  
186 performance – as they are expected to represent the performance plateau.<sup>36,56</sup> The number of  
187 correctly typed sequences accounts for speed and accuracy.<sup>35,36</sup>

## 188 **2.3 Functional connectivity**

189 The functional and structural images were acquired with a 3T Siemens Magnetom Tim Trio,  
190 on Syngo VB-17a (Erlangen, Germany) and a 32-channel head coil. Structural whole-brain  
191 T1-weighted images were realized with a magnetization prepared rapid gradient echo  
192 (MPRAGE) sequence (repetition time: 2250 ms, echo time: 3.26 ms, inversion time: 900 ms,  
193 flip angle: 9°, field of view: 256 mm, spatial resolution: 1 mm x 1 mm, 176 slices, acquisition  
194 time: 8:26 min) and a resulting voxel size of 1mm x 1mm x 1 mm.

195 Resting state functional MRI (rs-fMRI) was measured with an gradient echo EPI (echo planar  
196 imaging) sequence (repetition time: 2500 ms, echo time: 33 ms, flip angle 70°, multi-band-  
197 factor 3, field of view 210 mm, spatial resolution: 2 mm x 2 mm, 60 slides with 2 mm  
198 thickness, distance factor 10%, 125 volumes (first 5 volumes deleted)) with a total acquisition  
199 time of 5:25 min, voxel size of 2 mm x 2 mm x 2 mm and a slice orientation along the  
200 anterior-posterior commissure.

201 Brain images were analyzed with SPM12 ([www.fil.ion.ucl.ac.uk/spm](http://www.fil.ion.ucl.ac.uk/spm), Wellcome Trust  
202 Centre for Neuroimaging, London, United Kingdom) based on MATLAB 2015b  
203 (MathWorks, Natick, Massachusetts) The following preprocessing steps were performed:  
204 default temporal high-pass filtering SPM12 at <0.008 Hz, slice-time-correction, realignment



205 with unwarping SPM12; spatial normalization with the deformation field from FreeSurfer  
206 Version 6.0 (<https://surfer.nmr.mgh.harvard.edu/>) run on an Ubuntu 18.0 to the standard  
207 Montreal Neurological Institute (MNI) 152 brain at 2 mm spatial resolution; spatial  
208 smoothing with a Gaussian kernel of 6 mm full width at half maximum (FWHM); nuisance-  
209 regression of white matter and cerebral spinal fluid as well as motion correction with an  
210 automatized independent component analysis based cleaning procedure (ICA-AROMA v0.3-  
211 bet, available from: <https://github.com/maartenmennes/ICA-AROMA>).<sup>57</sup> To ensure all  
212 autocorrelative signal was regressed out, a visual inspection of all data for quality control was  
213 performed. If potential noise artefacts remained, they were added as additional “noise”  
214 components to the automatically identified by ICA-AROMA and the cleaning procedure was  
215 rerun. In addition to this extensive correction of movement we also assessed potential bias  
216 due to different extend of movement between the groups by comparing individual root mean  
217 squares based on frame-by-frame displacement of adjacent volumes in mm between the  
218 groups in an repeated measures ANOVA (rmANOVA).<sup>58</sup>

219 Seed-based analyses aimed to address functional connectivity differences and its influences  
220 on motor performance of the right hemisphere hand M1 and the PCC, especially to the SMA  
221 as the core region of our hypotheses. To define the M1 gray matter seeds, we combined the  
222 anatomical T1 information from the precentral gyrus from FreeSurfer segmentation with a  
223 7 mm radius spherical seed, defined using the SPM toolbox MarsBaR version 0.44  
224 (<http://marsbar.sourceforge.net/>), which was centered at the MNI-coordinates 40 -20 54 (x, y,  
225 z) for the right hemisphere hand M1 from a meta-analysis of functional MRI data of hand  
226 movement tasks.<sup>59</sup> The overlap between these two sources was carefully inspected for  
227 consistency in every individual subject’s data (see an example for precise coverage of the  
228 grey matter with a seed based on this technique in Fig. 1). To make sure that differences in  
229 functional connectivity did not stem from differences in the seed volume, we checked if the  
230 volume of the individualized masks differed between groups or time with an rmANOVA in  
231 SPSS (for results see Supplementary material, chapter 2.2). The newly established seed  
232 definition technique was also applied to create seeds for the PCC (MNI coordinates 0 -53 26  
233 (x, y, z)) (for an example see Fig. 1), centered in the position used for the investigation of  
234 motor impairments in stroke.<sup>17</sup>



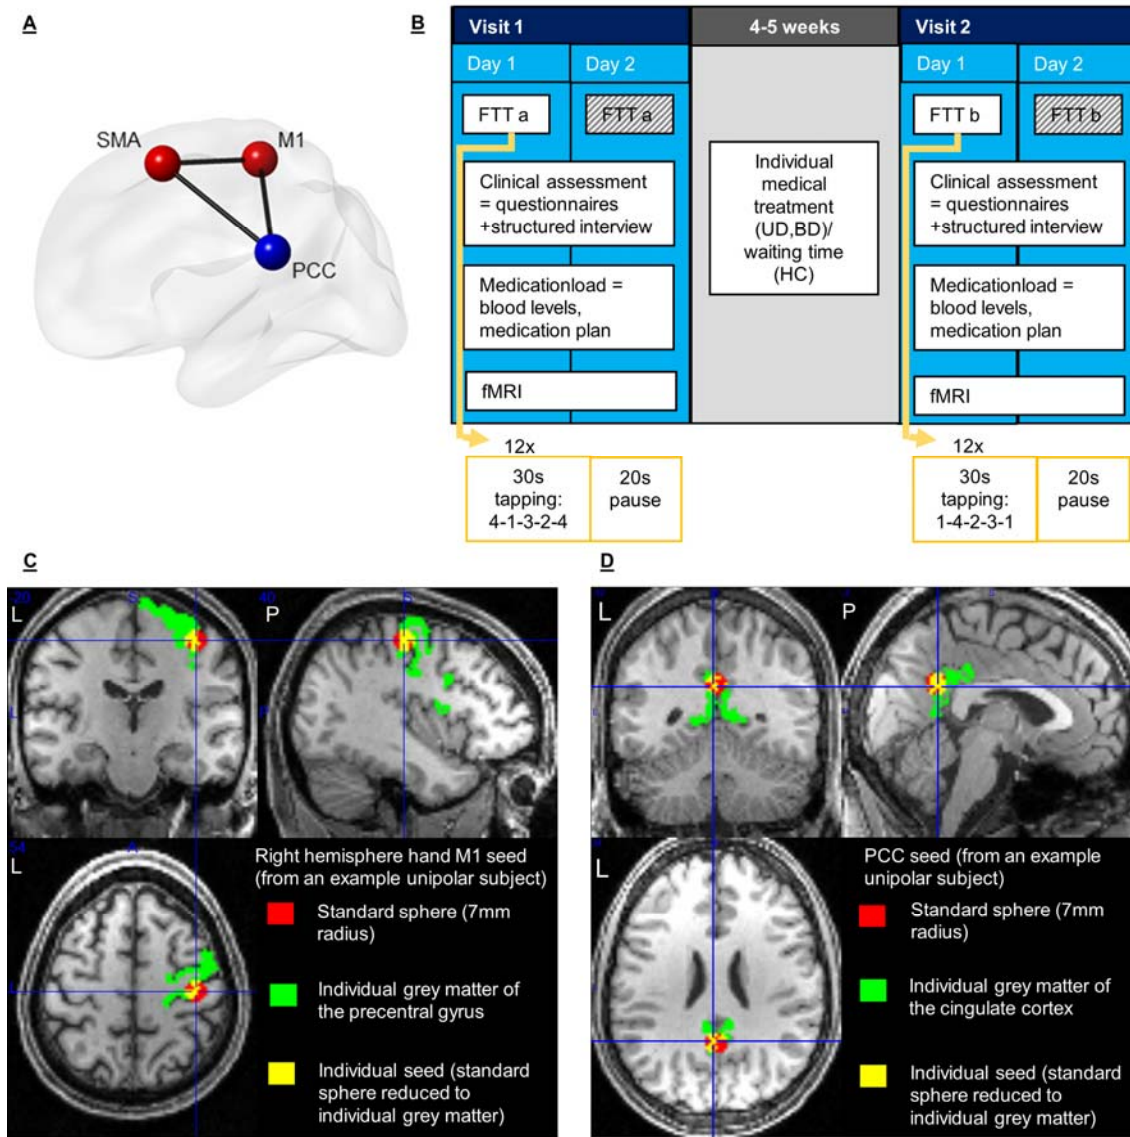

235

236 **Figure 1 Methods (A)** Connectivity model between regions of interest: supplementary motor area (SMA) and  
 237 right hemisphere hand primary motor cortex (M1) as part of the sensory motor network (red), posterior cingulate  
 238 cortex (PCC) as part of the default mode network (blue); **(B)** Study design: unipolar (UD), bipolar (BD)  
 239 depressed and healthy control subjects (HC) performed the finger-tapping-task (FTT) on both days of both  
 240 visits, FTTa and FTT b versions as described in methods section. The data of the second days was not used for  
 241 the analysis of motor performance. The clinical assessment and the MRI sessions took place on one of the days.  
 242 The blood sample was taken as close as possible before the MRI measurement; **(C)** Seed definition technique:  
 243 exemplification of the overlapping area (yellow) based on FreeSurfer individual segmentation of grey matter  
 244 (green) and a spherical seed (red) at the MNI coordinates  $x = 40, y = -20, z = 54$  of functional coordinates for  
 245 right hemisphere hand motor cortex (M1)<sup>59</sup> **(D)** and at  $x = 0, y = -53, z = 2$  for the posterior cingulate cortex<sup>17</sup>.

246 The time courses of these seeds were bandpass filtered (0.01 Hz – 0.1 Hz) before being  
 247 included into a general linear model (GLM) in SPM12 for the first level analysis. According

248 to the known task-positive and task-negative activations in the right hemisphere hand M1 and  
249 PCC respectively, we focused on brain regions positively correlated when seeding in the right  
250 hemisphere hand M1 and regions negatively correlated (anticorrelated) when seeding in the  
251 PCC.

252 To investigate potential full network interconnection deficiency between SMN and DMN in  
253 depressive patients, a group independent component analysis (gICA) was performed using  
254 MELODIC Version 3.14 in FSL (FMRIB's Software Library, [www.fmrib.ox.ac.uk/fsl](http://www.fmrib.ox.ac.uk/fsl)),<sup>60</sup> to  
255 be able to estimate correlation between the time courses of these networks in all groups  
256 before and after intervention. The gICAs were performed for each group and each visit  
257 separately. Then, all the components were inspected selecting the components reflecting  
258 SMN, anterior DMN and posterior DMN. The time course of the network signal from every  
259 subject was extracted separately for each selected component. For every subject a correlation  
260 coefficient for the correlation between the time courses of the SMN and the anterior DMN as  
261 well as for the correlation between the SMN and the posterior DMN was calculated using  
262 MATLAB 2015b (MathWorks, Natick, Massachusetts).

## 263 **2.4 Statistical Analysis**

264 The FTT was analyzed with an rmANOVA for motor performance in IBM SPSS Statistics  
265 Version 26. In the main analysis no covariates were included, but to check for influencing  
266 effects, the analysis was repeated with the covariates sex, age, education, change of the  
267 medication load and change in BDI-II, which have the potential to influence the motor  
268 performance.<sup>25,61-65</sup> Furthermore, models with only the patient groups were created to  
269 consider potential effects of years since first episode, age of onset, number of depressive  
270 episodes, change in MADRS and change in YMRS, which have been described in the  
271 literature.<sup>29,63</sup> The statistical threshold for the tests was set to two-tailed  $p < 0.05$ . If the  
272 assumption of homogeneity of variance was met for the ANOVAs, we used the Bonferroni  
273 post-hoc-test to correct for multiple testing. But if this assumptions was not met, we used the  
274 Games-Howell post-hoc-test.

275 For the seed based rs-fMRI data, two SPM full factorial models with group and time as  
276 factors were built for the two seeds in the second level analysis, one without covariates and  
277 one with medication load as covariate-of-no-interest to control for potential differences  
278 stemming from the load of medication the patients received. In addition, linear regressions

279 with functional connectivity of the seed and motor performance were calculated for the whole  
280 study population.

281 The correlation coefficients were used for an rmANOVA model calculated in SPSS to  
282 investigate whether possible correlations between the networks differed between groups or  
283 time. Additionally, a linear regression was performed for each visit to test for a relationship  
284 between the SMN-DMN time course correlations and the motor performance.

285 In regions belonging to our a priori hypothesis, we considered the statistical threshold at the  
286 cluster-wise correction level ( $p_{FWEc} < 0.05$ ) to reduce the probability of both false-positive  
287 and false-negative results. Otherwise, we considered the family-wise error correction level ( $p_{FWE} < 0.05$ ) to reduce the probability of false-positive results. The labeling of functional  
288 imaging clusters was performed according to the automated anatomical labeling (AAL)  
289 atlas.<sup>66</sup>  
290

## 291 **2.5 Data availability**

292 The data supporting the findings of this study are available from the corresponding author  
293 upon request. Due to restrictions in the data sharing consent obtained from the study  
294 participants the data are not publicly available.

## 295 **3. Results**

296 From 95 participants, 11 were unable or unwilling to complete the entire study, one  
297 participant performed the FTT with the wrong hand and four participants were excluded due  
298 to abnormalities in the anatomical scans, e.g. intracranial epidermoid cysts. Therefore, data  
299 from 79 participants (31 HC, 27 UD, 21 BD - 18 Type I, three Type II) were taken into final  
300 analysis. One participant from each of the HC and BD groups and two participants of the UD  
301 group were lefthanded.

### 302 **3.1 Characterization of groups**

303 The mean time between the two visits was 4.9 weeks (SD 0.8). A complete evaluation of the  
304 characteristics between groups is presented in Table 1. In line with our matching, the groups  
305 were comparable in terms of sex, age and years of education. The patient groups did not

306 differ in terms of the history of their disease measured by age of onset, years since first  
307 episode and number of depressive episodes. The healthy controls did not exceed the threshold  
308 of normality in the global severity index of the SCL-90-R score.

309 The severity of the depressive episode was evaluated during the study and at both visits the  
310 patient groups showed comparable depressive episode severity according to the BDI-II  
311 scores. The comparison of the difference in BDI-II scores of visit 1 and 2 between groups  
312 revealed a significantly higher difference only for UD compared to HC (Table 1). An  
313 rmANOVA with the BDI-II scores revealed a significant change between visit 1 and 2 that  
314 seems driven by a stronger reduction in the patient groups (factor “time”  $F(1,76) = 15.660$ ,  $p$   
315  $< 0.001$ ; interaction “group x time”  $F(2,76) = 6.035$ ,  $p = 0.004$ ; factor “group”  $F(2,76) =$   
316  $41.138$ ,  $p < 0.001$ ).

317 In MADRS, the severity of depressive symptoms was significantly higher in UD, but only at  
318 the first visit (Table 1). An rmANOVA with the MADRS scores revealed a significant  
319 reduction between visit 1 and 2 for both patient groups but stronger in UD than in BD (factor  
320 “time”  $F(1,46) = 21.067$ ,  $p < 0.001$ ; interaction “group x time”  $F(1,46) = 5.179$ ,  $p = 0.028$ ;  
321 factor “group”  $F(1,46) = 8.903$ ,  $p = 0.005$ ). There was a significant difference seen for  
322 YMRS scores with BD showing higher scores and a stronger reduction across time than UD  
323 in an rmANOVA (factor “time”  $F(1,46) = 10.067$ ,  $p = 0.003$ ; interaction “group x time”  
324  $F(1,46) = 7.024$ ,  $p = 0.011$ ; factor “group”  $F(1,46) = 7.491$ ,  $p = 0.009$ ).

325 Although only bipolar patients in the current depressive episode were recruited, the  
326 symptoms were mixed in some patients. At the first visit, three bipolar patients showed  
327 subclinical depressive symptoms ( $BDI-II$  score  $\leq 8$  and  $MADRS$  score  $\leq 12$ ), five showed  
328 manic symptoms ( $YMRS$  score  $> 9$ ) and one showed both manic ( $YMRS$  score of this subject  
329 at visit 1 = 14) and depressive ( $BDI-II$  score of this subject at visit 1 = 53;  $MADRS$  score of  
330 this subject at visit 1 = 28) symptoms. Even though being subclinical ( $M_{YMRS} \leq 9$ ), the BD  
331 group showed a significantly higher YMRS score on visit 1 compared to the UD, as well as a  
332 greater change in YMRS score between the two visits. To confirm that the main results were  
333 not driven by the individuals with manic symptoms characteristics or subclinical depressive  
334 symptoms characteristics, we compared mean motor performance scores of the original BD  
335 group, with a subgroup of BD with clinical depressive symptoms only, which showed  
336 comparable values ( $BD$  visit 1 =  $8.6 \pm 4.6$  ( $M \pm SD$ ) (Fig. 2);  $BD$  visit 1 with clinical  
337 depressive symptoms only:  $8.4 \pm 4.9$  ( $M \pm SD$ )). We also repeated the imaging analysis of

338 linear regression of motor performance scores and functional connectivity of PCC seeds  
 339 without the BD subjects showing manic, mixed or subclinical symptoms and the main results  
 340 could still be identified.

341 No difference in medication load between patient groups was seen at visit 1 or visit 2, but the  
 342 load in both visits was significantly higher compared to HC, since they were not medicated.  
 343 Furthermore, the change in medication load between visit 1 and 2 was small in the patient  
 344 groups (Table 1) and not distinguishable from the HC on an additional rmANOVA (factor  
 345 “time”  $F(1,76) = 2.431, p = 0.123$ ; interaction “group x time”  $F(2,76) = 1.155, p = 0.320$ ;  
 346 factor “group”  $F(2,76) = 48.226, p < 0.001$ ). For a detailed description of medication taken  
 347 by the patient groups see tables of chapter 2.1 in the Supplementary material.

348 **Table 1: Characteristics of the bipolar (BD), unipolar (UD) and healthy control (HC) groups**

|                                | <i>Controls</i> | <i>Unipolar</i> | <i>Bipolar</i> | <i>Comparison p-value</i> | <i>Meaning of p</i>                                                                                                       |
|--------------------------------|-----------------|-----------------|----------------|---------------------------|---------------------------------------------------------------------------------------------------------------------------|
| N (% female)                   | 31 (58.1%)      | 27 (40.7%)      | 21 (33.3%)     | 0.176 <sup>a</sup>        | No difference between groups                                                                                              |
| Age in years                   | 41.7 ± 14.3     | 39.6 ± 15.3     | 43.5 ± 9.8     | 0.591 <sup>b</sup>        | No difference between groups                                                                                              |
| Education in years             | 16.5 ± 3.8      | 15.5 ± 3.1      | 16.8 ± 4.0     | 0.453 <sup>c</sup>        | No difference between groups                                                                                              |
| Number lefthanders             | 1 (3.2%)        | 2 (7.4%)        | 1 (4.8%)       | X <sup>d</sup>            | X <sup>d</sup>                                                                                                            |
| Age of first episode           | X               | 29.5 ± 15.2     | 24.7 ± 9.5     | 0.182 <sup>b</sup>        | No difference between groups                                                                                              |
| Years since first episode      | X               | 10.1 ± 9.4      | 18.9 ± 13.5    | 0.161 <sup>b</sup>        | No difference between groups                                                                                              |
| Number of depressive episodes  | X               | 4.8 ± 3.8       | 7.2 ± 6.1      | 0.095 <sup>c</sup>        | No difference between groups                                                                                              |
| Number of manic episodes       | X               | X               | 2.9 ± 3.6      | X                         | X                                                                                                                         |
| Number of hypomanic episodes   | X               | X               | 3.3 ± 5.0      | X                         | X                                                                                                                         |
| BDI-II visit 1                 | 2.6 ± 3.7       | 29.5 ± 11.1     | 21.1 ± 16.7    | <0.001 <sup>b</sup>       | Games-Howell-Post-Hoc-Test: Difference HC and UD: <b>p&lt;0.001</b> , HC and BD: <b>p&lt;0.001</b> , UD and BD: p = 0.128 |
| BDI-II visit 2                 | 2.3 ± 4.2       | 20.2 ± 14.0     | 17.1 ± 13.1    | <0.001 <sup>b</sup>       | Games-Howell-Post-Hoc-Test: Difference HC and UD: <b>p&lt;0.001</b> , HC and BD: <b>p&lt;0.001</b> , UD and BD: p = 0.714 |
| Delta BDI-II visit 2 – visit 1 | -0.2 ± 2.6      | -9.3 ± 11.9     | -3.9 ± 13.3    | 0.009 <sup>b</sup>        | Games-Howell-Post-Hoc-Test: Difference HC and UD: <b>p = 0.002</b> , HC and BD: p = 0.437, UD and BD: p = 0.327           |
| MADRS visit 1                  | X               | 24.2 ± 8.6      | 13.9 ± 10.6    | 0.001 <sup>c</sup>        | Severity of depressive symptoms is higher in UD                                                                           |
| MADRS visit 2                  | X               | 14.3 ± 10.2     | 10.5 ± 8.3     | 0.179 <sup>c</sup>        | No difference between groups                                                                                              |
| Delta MADRS visit 2 – visit 1  | X               | -9.9 ± 10.3     | -3.3 ± 9.3     | 0.028 <sup>c</sup>        | Reduction in the severity of depressive symptoms is higher in UD                                                          |
| YMRS visit 1                   | X               | 1.7 ± 2.6       | 6.1 ± 6.9      | 0.012 <sup>b</sup>        | Severity of manic symptoms (mixed episode) is higher in BD                                                                |
| YMRS visit 2                   | X               | 1.4 ± 1.7       | 2.3 ± 3.5      | 0.222 <sup>b</sup>        | No difference between groups                                                                                              |

|                                                |       |            |            |                                                                |                                                                                                                           |
|------------------------------------------------|-------|------------|------------|----------------------------------------------------------------|---------------------------------------------------------------------------------------------------------------------------|
| <b>Delta YMRS visit 2 – visit 1</b>            | X     | -0.3 ± 2.1 | -3.7 ± 6.2 | <b>0.025<sup>b</sup></b>                                       | Reduction in the severity of manic symptoms (mixed episode) is higher in BD                                               |
| <b>Medication load visit 1</b>                 | 0 ± 0 | 4.3 ± 3    | 4.5 ± 2.4  | No p-value because of a variance of 0 in controls <sup>b</sup> | Games-Howell-Post-Hoc-Test: Difference HC and UD: <b>p&lt;0.001</b> , HC and BD: <b>p&lt;0.001</b> , UD and BD: p = 0.938 |
| <b>Medication load visit 2</b>                 | 0 ± 0 | 4.1 ± 2.6  | 3.8 ± 2.3  | No p-value because of a variance of 0 in controls <sup>b</sup> | Games-Howell-Post-Hoc-Test: Difference HC and UD: <b>p&lt;0.001</b> , HC and BD: <b>p&lt;0.001</b> , UD and BD: p = 0.925 |
| <b>Delta medication load visit 2 – visit 1</b> | 0 ± 0 | -0.2 ± 1.9 | -0.7 ± 2.5 | No p-value because of a variance of 0 in controls <sup>b</sup> | Games-Howell-Post-Hoc-Test: Difference HC and UD: p = 0.867, HC and BD: p = 0.405, UD and BD: p = 0.700                   |

349 <sup>a</sup>Chi-Square-Test-Pearson

350 <sup>b</sup>One-way-ANOVA with Brown-Forsythe correction for inhomogeneity of variance

351 <sup>c</sup>One-way-ANOVA with homogeneity of variance

352 <sup>d</sup>Analysis repeated without lefthanders

353 Abbreviations: BD = Bipolar depressed; BDI-II = Beck-Depression-Rating-Scale second version; HC =

354 Healthy controls; MADRS = Montgomery Åsberg Depression Rating Scale; UD = Unipolar depressed ; YMRS

355 = Young-Mania-Rating-Scale

## 356 3.2 Behavioral results

357 The motor performance differed between groups (ANOVA factor “group”  $F(2,76) = 4.122$ ;  
 358  $p = 0.020$ ; Fig. 2) with BD showing a significantly reduced number of correctly performed  
 359 finger tapping trials compared to the HC (Post-hoc-test  $p = 0.023$ ). The UD group showed no  
 360 performance impairment compared to HC (Post-hoc-test  $p = 0.158$ ). The BD and UD showed  
 361 no significant difference (Post-hoc-test  $p = 1$ ).

362 All groups showed an improvement of their motor performance in visit 2 (ANOVA factor  
 363 “time”  $F(1,76) = 33.800$ ;  $p < 0.001$ ). The improvement did not differ between the groups  
 364 (interaction “group x time”  $F(2,76) = 0.230$ ;  $p = 0.795$ ).



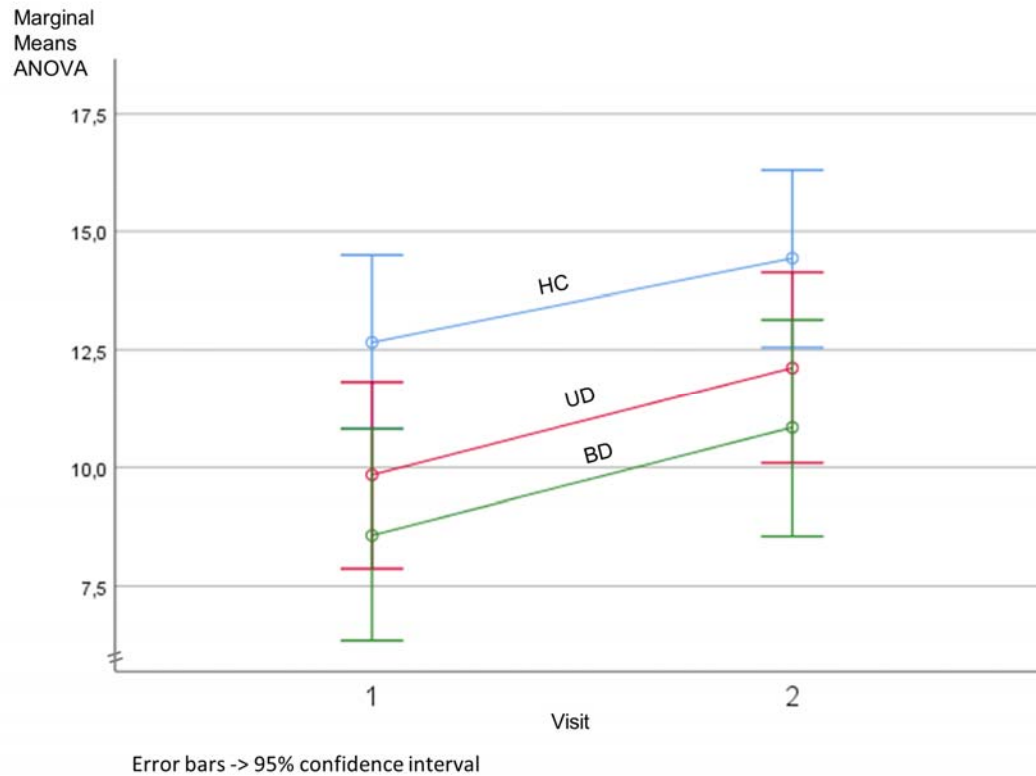

365

366 **Figure 2 Motor performance scores** Marginal means (mean number of correctly tapped sequences per 30  
367 seconds) and confidence intervals from repeated-measures ANOVA of motor performance scores for healthy  
368 controls (HC, blue), unipolar (UD, pink) and bipolar (BD, green) patients. The values displayed in the graph are  
369 HC visit 1  $M \pm SD = 12.7 \pm 6.1$ , UD visit 1  $M \pm SD = 9.8 \pm 4.2$ , BD visit 1  $M \pm SD = 8.6 \pm 4.6$ , HC visit 2  $M \pm$   
370  $SD = 14.4 \pm 5.8$ , UD visit 2  $M \pm SD = 12.1 \pm 5.0$ , BD visit 2  $M \pm SD = 10.8 \pm 4.7$ . Significant differences are  
371 seen only between HC and BD (ANOVA factor “group”  $F(2,76) = 4.122$ ;  $p = 0.020$ ) with BD showing a  
372 significantly reduced number of correctly performed finger tapping trials compared to the HC (Post-hoc-test  
373  $p = 0.023$ ).

374 By including the covariates sex, age, education, change of medication load and change in  
375 BDI-II into the model, the difference in performance between the groups remains  
376 significantly different (factor “group”  $F(2,71) = 5.194$ ;  $p = 0.008$ ) as does the comparable  
377 performance improvement of the groups across the two visits (interaction “group x time”  
378  $F(2,71) = 0.067$ ;  $p = 0.935$ ). However, the general effect of the performance improvement  
379 seen across the groups in visit 2 was not present anymore (factor “time”  $F(1,71) = 0.002$ ;  
380  $p = 0.966$ ).

381 Influences of covariates on the motor performance in general revealed a negative correlation  
382 with age ( $F(1,71) = 23.542$ ;  $p < 0.001$ ) and a positive correlation with education



383 ( $F(1,71) = 16.183$ ;  $p < 0.001$ ) for all groups. When limiting the ANOVA to the patient  
384 groups, an improvement across visits was present (factor “time”  $F(1,46) = 23.042$ ;  
385  $p < 0.001$ ), which did not differ between the groups (factor “group”;  $F(1,46) = 1.010$ ;  $p =$   
386  $0.320$ ) nor showed an interaction with visits (interaction “group” x “time” ,  $F(1,46) < 0.001$ ;  
387  $p = 0.999$ ). These results were maintained, when including the covariates years since first  
388 episode, age of onset, number of depressive episodes, change in MADRS and change in  
389 YMRS. An older age of first episode ( $F(1,41) = 5.808$ ;  $p = 0.021$ ) and more years since first  
390 episode ( $F(1,41) = 4.396$ ;  $p = 0.042$ ) reduced the motor performance. An increase in YMRS  
391 score was positively correlated with a change in motor performance (interaction time x  
392 deltaYMRS  $F(1,41) = 4.525$ ;  $p = 0.039$ ), a change in MADRS was not (interaction “time x  
393 deltaMADRS”  $F(1,41) = 0.799$ ;  $p = 0.377$ ). The number of depressive episodes showed a  
394 negative correlation with change in performance (interaction “time x number of depressive  
395 episodes”  $F(1,41) = 8.489$ ;  $p = 0.006$ ).

396 All results hold, when excluding the lefthanders from the analysis.

### 397 **3.3 Functional connectivity**

#### 398 **3.3.1 PCC seed functional connectivity**

399 For each group, the seed based functional connectivity between the PCC and the SMA was  
400 visible as a negative correlation at  $p FWE < 0.05$  level, except for the BD group at visit 2.  
401 This is in contrast to the seed based connectivity between PCC and M1, where no negative  
402 correlation was identified at  $p FWE < 0.05$  level in all groups and visits. Positive correlation  
403 to the PCC was evidenced for regions of the DMN, namely angular gyri, precuneus, cingulate  
404 gyri, and middle prefrontal regions (data not shown).

405 The connectivity between PCC and SMA was lower at visit 2 for BD in contrast to HC, as  
406 well as to UD, at  $p FWEc < 0.05$  level (Fig. 3). This remains the same, when excluding the  
407 lefthanders from the model. No group differences in the functional PCC-SMA connectivity  
408 were observed at visit 1. In addition, no differences in connectivity of PCC to M1 were  
409 observed between groups or time. Lastly, all findings from the PCC seed analysis are  
410 sustained, when medication load is included in the full factorial models as a regressor-of-no-  
411 interest.

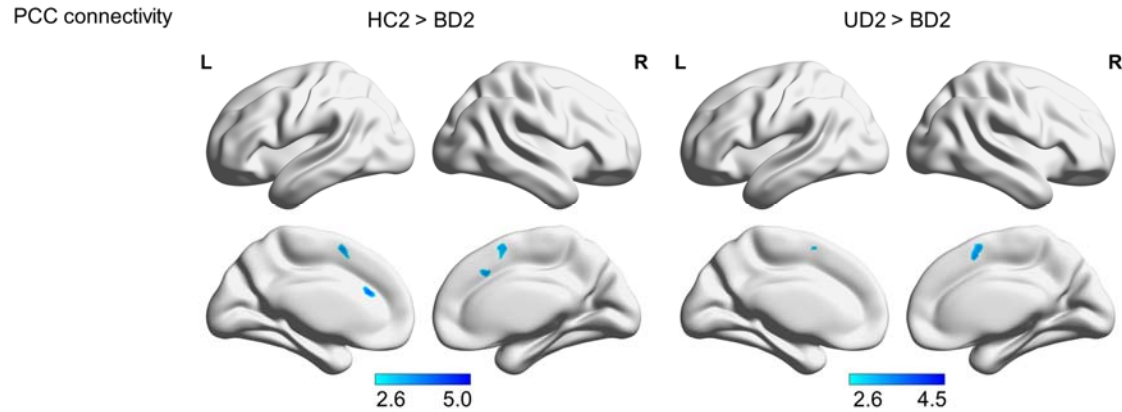

412

413 **Figure 3 PCC connectivity differences** Resting state functional connectivity differences of the posterior  
414 cingulate cortex (PCC) at the second visit between the bipolar depressive subjects (BD2) and the unipolar  
415 depressive (UD2) resp. control (HC2) subjects ( $p$  FWE $c$  < 0.05). HC2 showed higher connectivity measured by  
416 anticorrelation between the PCC and the bilateral SMA than BD2. UD2 showed higher connectivity measured  
417 by anticorrelation between the PCC and the bilateral SMA than BD2. Colorbar represents t-values.

418 The linear regression of the PCC-SMA functional connectivity and the motor performance  
419 scores revealed a positive correlation, i.e. the higher the performance the stronger the  
420 negative functional connectivity between PCC-SMA (Fig.4). When excluding the lefthanders  
421 from analysis the cluster in the SMA maintained at a level of  $p$  < 0.001 uncorrected, but did  
422 not survive FWE $c$  < 0.05 level anymore, most likely due to the reduced power by the lower  
423 number of subjects in the analysis.

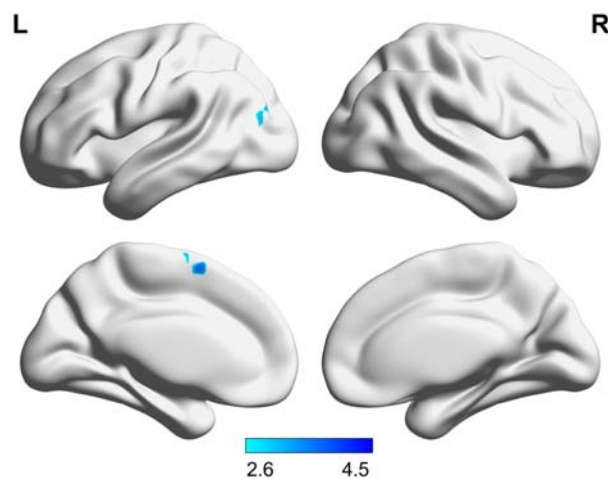

424

425 **Figure 4 PCC connectivity correlated with motor performance** Resting state functional connectivity of the  
426 posterior cingulate cortex (PCC) linearly correlated with the motor performance in the finger-tapping-task ( $p$   
427 FWE $c$  < 0.05). The motor performance is correlated with the connectivity (anticorrelation) strength between the  
428 PCC and the left supplementary motor area (SMA). Colorbar represents t-values.

429 On the other hand, the linear regression of the PCC-M1 functional connectivity and the motor  
430 performance scores showed no linear relationship. Above all, supporting the idea that lower  
431 PCC-SMA anticorrelation in BD is related to their behavioral impairment, a partial overlap in  
432 SMA is seen between the functional connectivity differences with other groups and the linear  
433 regression with motor performance (Fig. 5). In other words, part of the SMA in BD relates to  
434 both reduced performance in FTT and reduced functional connectivity to PCC, not M1.

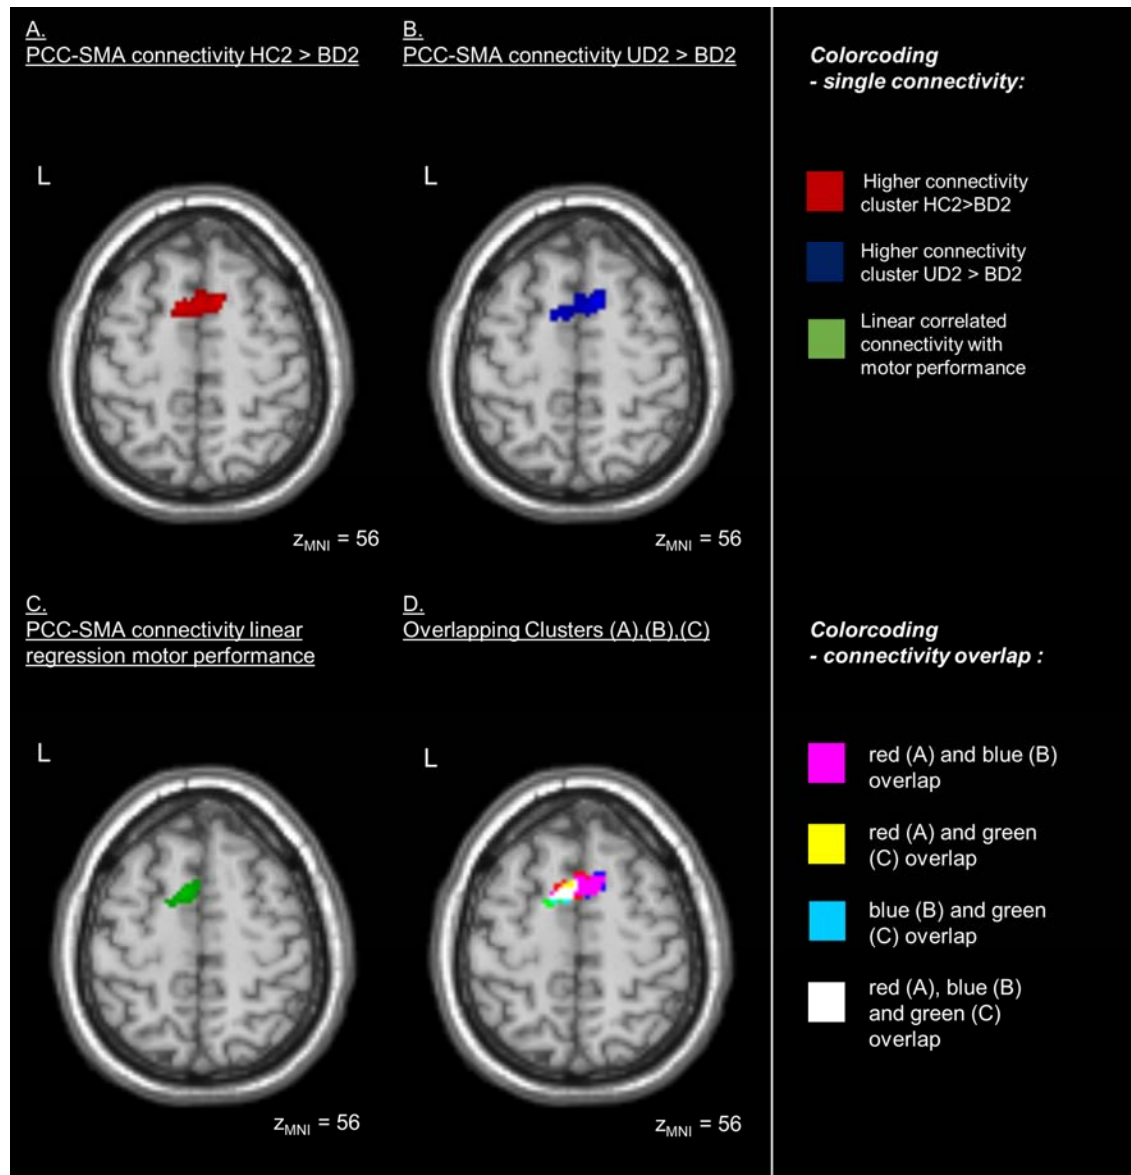

435

436 **Figure 5 PCC connectivity overlaps in the SMA** Resting state functional connectivity differences of the  
437 posterior cingulate cortex (PCC) between groups and connectivity of the PCC correlated with motor  
438 performance overlap in the supplementary motor area (SMA) at an axial plane ( $z_{MNI} = 56$ ,  $p_{FWEc} < 0.05$ ). (A)  
439 Healthy control subjects (HC2) show higher connectivity than the bipolar depressive subjects (BD2) at visit 2.  
440 (B) Unipolar depressive subjects (UD2) present higher connectivity than the bipolar depressive subjects (BD2)

441 at visit 2. (C) The connectivity of the PCC to a part of the left SMA is correlated with the motor performance in  
442 the finger-tapping-task. (D) The SMA connectivity clusters seen in (A, red), (B, blue) and (C, green) overlap in  
443 different extensions, as represented in pink ( $A \cap B$ ), yellow ( $A \cap C$ ), turquoise ( $B \cap C$ ) and white ( $A \cap B \cap C$ ).

### 444 3.3.1 M1 seed based functional connectivity

445 The positive functional connectivity between the right hemisphere hand M1 and the SMA  
446 could be shown at  $p FWE < 0.05$  for each of the groups. Additionally, other parts of the  
447 SMN, namely the pre- and postcentral gyrus bilaterally as well as bilateral temporal regions  
448 were identified. No negative correlation was evidenced at  $p FWE < 0.05$  (data not shown).

449 A higher connectivity between the M1 and the SMA was seen in HC compared to UD only at  
450 visit 2 ( $p FWEc < 0.05$ ) in the model where the medication load was inserted as regressor-of-  
451 no-interest. When excluding the lefthanders from the model with medication load as a  
452 regressor-of-no-interest, a higher connectivity between the right hemisphere hand M1 and the  
453 SMA was also seen at visit 1 at  $p FWEc < 0.05$  threshold.

454 Compared to UD, BD showed stronger connectivity between M1 and SMA on both visits  
455 (Fig. 6). At the first visit, these clusters survived  $p FWE < 0.05$  correction. At the second  
456 visit, differences were more restricted and seen only in the left hemisphere at  $p FWEc < 0.05$   
457 level. These differences between BD and UD held in the model with medication load as a  
458 regressor-of-no-interest as well as in the model without lefthanders. There was no  
459 connectivity of the M1 that was stronger in UD than in BD.

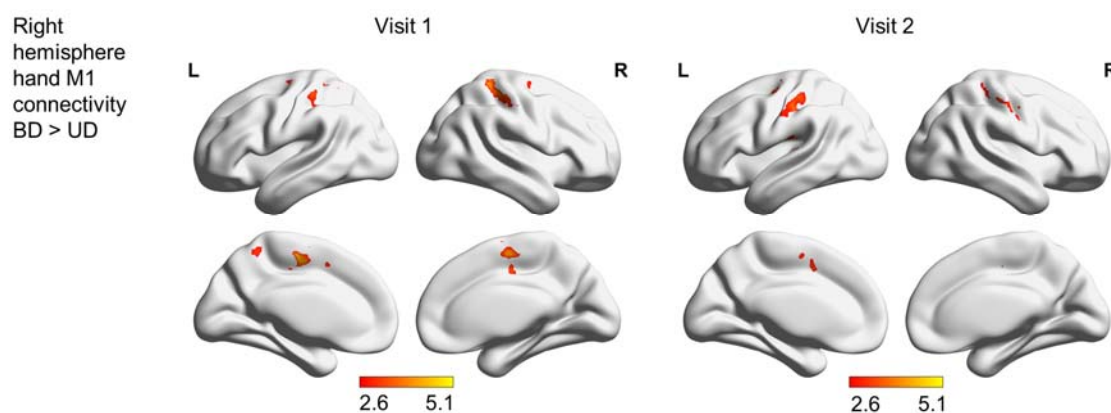

460

461 **Figure 6 M1 connectivity difference** Differences in the resting state functional connectivity of the right  
462 hemisphere hand motor area (M1) between bipolar (BD) and unipolar (UD) depressed participants at  $p$   
463  $FWEc < 0.05$ . BD showed stronger connectivity than UD between M1 and the bilateral SMA in visit 1 than in  
464 visit 2. No regions were evidenced in the UD>BD contrast. Colorbar represents t-values.

465 The linear regression of motor performance score and the right hemisphere hand M1-SMA  
466 functional connectivity did not show SMA clusters that survived  $p$  FWEc  $< 0.05$  correction,  
467 i.e. there was no correlation between the motor performance and functional connectivity  
468 between SMA and M1. This result remained when excluding the lefthanders from the model.  
469 All groups did not show changes of their right hemisphere hand M1 connectivity across time.  
470 Beyond our a priori hypotheses, higher connectivity in HC than UD at visit 2 between the  
471 right hemisphere hand M1 and the right Rolandic operculum was seen ( $p$  FWE  $< 0.05$ ). When  
472 controlling for the medication load as a regressor-of-no-interest, the cluster at the right  
473 Rolandic operculum was not seen. Furthermore, the cluster was not present, when excluding  
474 the lefthanders from the analysis. There was no further difference between BD and HC in any  
475 of these models.  
476 Finally, to check for potential bias in the seed model, we evaluated whether differences in  
477 movement exists during the scanning sessions, in spite of applying a strict motion correction  
478 procedure in the analysis. When comparing the frame-by-frame displacement with root-  
479 mean-squares<sup>58</sup> between the three groups, a difference was revealed, which do not seem to  
480 stem from a difference between the HC-BD groups (post-hoc  $p = 0.257$ ), but rather from a  
481 trend between the UD-BD groups (post-hoc  $p = 0.062$ ) (for detailed results see  
482 Supplementary material, chapter 2.3).

### 483 **3.4 SMN-DMN correlation coefficients**

484 The correlation coefficients between SMN and DMN were computed and compared between  
485 groups and across time in rmANOVAs (for results see Supplementary material, chapter 2.4,  
486 Table 6). In the linear regressions, the motor performance scores neither showed a  
487 relationship with the correlation of SMN and posterior DMN (visit 1:  $r < 0.001$ ,  $p = 0.903$ ;  
488 visit 2:  $r = 0.001$ ,  $p = 0.772$ ), nor with the correlation of SMN and anterior DMN on any of  
489 the visits (visit 1:  $r = 0.005$ ,  $p = 0.375$ ; visit 2:  $r = 0.002$ ,  $p = 0.700$ ). Similar to the models  
490 with lefthanders, no linear relationship between SMN-DMN correlation and motor  
491 performance was seen for visit 1 or visit 2.

## 492 **4. Discussion**

493 The current study examined the neural underpinnings of motor performance between groups  
494 of BD, UD and HC participants with comparable sex, age, education, medication load and  
495 history of disease. We identified a deficit in the FTT motor performance only in BD in  
496 relation to HC, which decreased after five weeks of psychopharmacotherapy. As expected, an  
497 association between the FTT motor performance and the negative functional connectivity  
498 between PCC and SMA was evidenced, which in the explorative investigation did not extend  
499 to the relationship between DMN-SMN correlations. Contrary to our expectations, an  
500 association between FTT motor performance and positive functional connectivity between  
501 M1 and SMA was not observed, suggesting that the contribution of M1 is less relevant than  
502 that of PCC in this case.

503 Although the motor circuit is one of the best described in the literature,<sup>for review see 67</sup> functional  
504 brain alterations in motor areas as part of depressive episodes remain poorly explored. In line  
505 with a former study showing the importance of the PCC-SMA connectivity for upper limb  
506 motor tasks,<sup>17</sup> we were able to show here that this connectivity also appears critical for the  
507 FTT performance. Since connectivity between PCC-SMA is linearly correlated with the FTT  
508 performance, which is impaired in BD compared to HC, one can assume that the functional  
509 brain difference between groups would explain the behavioral difference in the FTT. Despite  
510 these promising findings, one must consider that such results do not survive multiple testing  
511 correction ( $FWEc < 0.05$ ), when excluding the lefthanders, although they remain identifiable  
512 at the threshold  $p < 0.001$ . Rather than the lack of such connectivity effects in the model  
513 without lefthanders, the existence of these findings at this threshold supports the notion of a  
514 drop in power in detecting statistical differences. To our knowledge, this is the first time that  
515 PCC-SMA connectivity has been evaluated and identified as critical for motor performance  
516 in a study involving depressive and healthy subjects.

517 Psychomotor alterations are commonly seen in BD and sometimes in UD compared to HC,  
518 which has been suggested as a factor that negatively contributes to treatment response or even  
519 remission.<sup>24,25</sup> Therefore, this remains a very relevant topic of research. In line with a former  
520 study comparing psychomotor performance in UD, BD and HC,<sup>33</sup> we report evidence that BD  
521 are more likely to have an impairment in motor performance measured by the FTT. This  
522 finding is also in line with the literature showing more robust FTT impairment in BD<sup>18,19</sup> than



523 in UD, where it appears compromised only in some study samples.<sup>5,20,21,37-39</sup> Overall,  
524 learning effects seem to be present from the first FTT assessment to the second, differently  
525 from previously shown.<sup>68</sup> In a keyboard naive population from Kenya, it was seen that such  
526 learning effects only appeared in healthy controls and not in depressive subjects.<sup>39</sup> A possible  
527 explanation for the improvement in the FTT performance could be that depressive patients in  
528 our study were able to profit from treatment, which may have reflected at least partially in  
529 their performance. This is an interesting hypothesis involving possible neuroplasticity  
530 changes that could be addressed in the future.

531 The hypothesis that the resting state functional connectivity between the M1 and the SMA is  
532 not only critical for the motor performance in HC,<sup>42</sup> but also in UD and BD, was rejected  
533 since the linear regressions with motor performance did not show correlated clusters in the  
534 SMA when seeding the right hemisphere hand M1. As far as we know, this work is the first  
535 providing evidence that right hemisphere hand M1-SMA connectivity is not critical for  
536 influencing FTT motor performance in depressive subjects. Another possibility for negative  
537 findings is that the seed method in Herszage *et al.*<sup>42</sup> when detecting the functional  
538 representation of the hand with transcranial magnetic stimulation for each subject, could have  
539 been more precise. Since our method of seed determination includes not only functional but  
540 also individual anatomical information, it would be interesting to compare the two seeding  
541 methods in future studies to define the most promising way of detecting individual seeds.

542 Our results show that BD have a higher M1-SMA connectivity than UD at both timepoints.  
543 Since we did not find behavioral differences in the FTT between the two patient groups, we  
544 can only hypothesize that the M1-SMA connectivity might have relevance for other  
545 symptoms of depression that were beyond the scope of this work. Groups, both BD and UD  
546 were comparably depressed, in a moderate level according to BDI-II scores, but only the UD  
547 improved significantly in the second evaluation, which might be a limitation when comparing  
548 the longitudinal changes during treatment. We speculate that residual psychomotor symptoms  
549 in BD, including the differences seen in neural correlates, may contribute for the limited  
550 improvement since psychomotor retardation is known as a negative predictor for  
551 antidepressant treatment response.<sup>69</sup> All individual seeds used for M1 and PCC functional  
552 connectivity analysis have been carefully created and inspected for structural accuracy of  
553 each individual anatomy aiming at the participant's hand knob. Furthermore, their volumes  
554 did not differ across groups, which per se could lead to false conclusions. Finally, we



555 carefully controlled our main findings for medication load and movement during scanning  
556 sessions, where we found no evidence that our main findings might have been biased from  
557 these covariates. A trend difference of movement between groups should be kept in mind. To  
558 best remove potential bias stemming from movement, we used movement correction with  
559 ICA-AROMA which was shown to be very efficient<sup>70</sup> and extended it with manual checking  
560 for artificial signals, so we believe that our results from BD-UD comparison are not biased by  
561 movement. In our view, our results also open new research perspectives for the comparisons  
562 between patient groups. For example, it may be interesting in the future to use motor  
563 paradigms that comprise a motor planning component, which may be more sensitive in  
564 detecting differences in behavior between UD and BD. This approach can be useful in new  
565 ways to support early differential diagnosis where there is a clear clinical need.<sup>71</sup>

566 It was postulated that the imbalance between the SMN and the DMN is critical for motor  
567 performance in depression.<sup>for review see 6</sup> Therefore, it might be expected that the  
568 interconnection between the SMN and DMN, as a task positive and a task negative network  
569 respectively<sup>47,72</sup>, is critical for motor performance in the FTT. To explore whether this model  
570 could explain the motor performance differences in a more consistent way than our seed  
571 model would, we computed individual correlation coefficients between SMN and DMN. The  
572 idea that the SMN-DMN connectivity is critical for FTT was rejected, since no linear  
573 relationship between correlation coefficients and the motor performance were revealed. It is  
574 possible that a model taking into account the imbalance between whole networks containing  
575 many regions is likely to oversimplify more complex neural mechanisms in this case.

576 Some potential limitations need to be mentioned, which make our results be viewed with  
577 caution. Our sample size is comparable to other studies, but likely modest taking into account  
578 the limited power in detecting differences when excluding the lefthanders. Therefore, a  
579 replication of our findings with larger samples is prudent. Another important aspect is the use  
580 of medication, which has been very tightly controlled, but still could have influenced the  
581 results in unpredictable ways. Probably due to fast switches in mood, not all BD were rated  
582 with depressive symptoms at a clinical threshold at the day of testing and some also showed a  
583 combination of depressive and manic symptoms (mixed episode), which might be a limitation  
584 of this study but reflects clinical reality. Noteworthy, considering that BD can be often  
585 misdiagnosed as UD,<sup>71</sup> we observed the occurrence of manic symptoms in one patient part of  
586 the UD group, for whom the YMRS was in the clinical range. Nevertheless, all patients

587 included in this study had a long history of disease and a diagnosis confirmed by multiple  
588 caregivers of the clinical setting, which reduces the risk of a BD being misdiagnosed as  
589 UD.<sup>71,73</sup>

590 In conclusion, our seed model supports the notion that functional connectivity between PCC-  
591 SMA explains the FTT performance in healthy and depressed individuals, but the functional  
592 connectivity between M1-SMA does not. Reinforcing the relevance and originality of these  
593 findings, the SMN-DMN correlation did not explain motor performance as the seed model.

## 594 **5. Funding**

595 This work was supported by the University Medical Center Göttingen (UMG) and the  
596 German Federal Ministry of Education and Research (Bundesministerium fuer Bildung und  
597 Forschung, BMBF: 01 ZX 1507, ‘‘PreNeSt - e:Med’’).

## 598 **6. Competing interests**

599 The authors report no competing interests.

## 600 **7. Acknowledgements**

601 We would like to thank PD Dr. Peter Dechent and Dr. Carsten Schmidt-Samoa for their  
602 support and advice.

## 603 **8. References**

- 604 1. Gardini S, Venneri A, McGeown WJ, et al. Brain Activation Patterns Characterizing  
605 Different Phases of Motor Action: Execution, Choice and Ideation. *Brain Topogr.*  
606 2016;29(5):679-692. doi:10.1007/s10548-016-0491-5
- 607 2. Grafton ST, Hamilton AF de C. Evidence for a distributed hierarchy of action  
608 representation in the brain. *Hum Mov Sci.* 2007;26(4):590-616.  
609 doi:10.1016/j.humov.2007.05.009
- 610 3. Witt ST, Laird AR, Meyerand ME. Functional neuroimaging correlates of finger-  
611 tapping task variations: An ALE meta-analysis. *NeuroImage.* 2008;42(1):343-356.  
612 doi:10.1016/j.neuroimage.2008.04.025

- 613 4. Liberg B, Adler M, Jonsson T, et al. The neural correlates of self-paced finger tapping  
614 in bipolar depression with motor retardation. *Acta Neuropsychiatr.* 2013;25(1):43-51.  
615 doi:10.1111/j.1601-5215.2012.00659.x
- 616 5. Genzel L, Dresler M, Cornu M, et al. Medial Prefrontal-Hippocampal Connectivity and  
617 Motor Memory Consolidation in Depression and Schizophrenia. *Biol Psychiatry.*  
618 2015;77(2):177-186. doi:10.1016/j.biopsych.2014.06.004
- 619 6. Northoff G, Hirjak D, Wolf RC, Magioncalda P, Martino M. All roads lead to the motor  
620 cortex: psychomotor mechanisms and their biochemical modulation in psychiatric  
621 disorders. *Mol Psychiatry.* Published online June 17, 2020:1-11. doi:10.1038/s41380-  
622 020-0814-5
- 623 7. Sarkheil P, Odysseos P, Bee I, Zvyagintsev M, Neuner I, Mathiak K. Functional  
624 connectivity of supplementary motor area during finger-tapping in major depression.  
625 *Compr Psychiatry.* 2020;99:152166. doi:10.1016/j.comppsy.2020.152166
- 626 8. Roland PE, Larsen B, Lassen NA, Skinhoj E. Supplementary motor area and other  
627 cortical areas in organization of voluntary movements in man. *J Neurophysiol.*  
628 1980;43(1):118-136. doi:10.1152/jn.1980.43.1.118
- 629 9. Boschert J, Hink RF, Deecke L. Finger movement versus toe movement-related  
630 potentials: Further evidence for supplementary motor area (SMA) participation prior to  
631 voluntary action. *Exp Brain Res.* 1983;52(1):73-80. doi:10.1007/BF00237151
- 632 10. Jo H-G, Habel U, Schmidt S. Role of the supplementary motor area in auditory sensory  
633 attenuation. *Brain Struct Funct.* 2019;224(7):2577-2586. doi:10.1007/s00429-019-  
634 01920-x
- 635 11. Nachev P, Kennard C, Husain M. Functional role of the supplementary and pre-  
636 supplementary motor areas. *Nat Rev Neurosci.* 2008;9(11):856-869.  
637 doi:10.1038/nrn2478
- 638 12. Rolls ET. The cingulate cortex and limbic systems for emotion, action, and memory.  
639 *Brain Struct Funct.* 2019;224(9):3001-3018. doi:10.1007/s00429-019-01945-2
- 640 13. Berman MG, Peltier S, Nee DE, Kross E, Deldin PJ, Jonides J. Depression, rumination  
641 and the default network. *Soc Cogn Affect Neurosci.* 2011;6(5):548-555.  
642 doi:10.1093/scan/nsq080
- 643 14. Ho TC, Connolly CG, Henje Blom E, et al. Emotion-Dependent Functional  
644 Connectivity of the Default Mode Network in Adolescent Depression. *Biol Psychiatry.*  
645 2015;78(9):635-646. doi:10.1016/j.biopsych.2014.09.002
- 646 15. Preuss A, Bolliger B, Schicho W, et al. SSRI Treatment Response Prediction in  
647 Depression Based on Brain Activation by Emotional Stimuli. *Front Psychiatry.*  
648 2020;11:1071. doi:10.3389/fpsy.2020.538393
- 649 16. Zhou H-X, Chen X, Shen Y-Q, et al. Rumination and the default mode network: Meta-  
650 analysis of brain imaging studies and implications for depression. *NeuroImage.*  
651 2020;206:116287. doi:10.1016/j.neuroimage.2019.116287

- 652 17. Wu CW, Lin S-HN, Hsu L-M, et al. Synchrony Between Default-Mode and  
653 Sensorimotor Networks Facilitates Motor Function in Stroke Rehabilitation: A Pilot  
654 fMRI Study. *Front Neurosci.* 2020;14. doi:10.3389/fnins.2020.00548
- 655 18. Coffman JA, Bornstein RA, Olson SC, Schwarzkopf SB, Nasrallah HA. Cognitive  
656 impairment and cerebral structure by MRI in bipolar disorder. *Biol Psychiatry.*  
657 1990;27(11):1188-1196. doi:10.1016/0006-3223(90)90416-Y
- 658 19. Shinn AK, Yuksel C, Masters G, et al. Procedural memory consolidation after a night of  
659 sleep in bipolar disorder with psychotic features. *Schizophr Res.* 2019;210:299-300.  
660 doi:10.1016/j.schres.2018.12.044
- 661 20. Hueng T-T, Lee IH, Guog Y-J, et al. Is a patient-administered depression rating scale  
662 valid for detecting cognitive deficits in patients with major depressive disorder?  
663 *Psychiatry Clin Neurosci.* 2011;65(1):70-76. doi:10.1111/j.1440-1819.2010.02166.x
- 664 21. Lee CJ, Lee L-T, Tsai HC, et al. Factors related to metabolic parameters in medicated  
665 patients with major depressive disorder—a naturalistic study. *Psychiatry Res.*  
666 2018;268:28-33. doi:10.1016/j.psychres.2018.06.061
- 667 22. World Health Organization, ed. *The ICD-10 Classification of Mental and Behavioural*  
668 *Disorders: Diagnostic Criteria for Research.* World Health Organization; 1993.
- 669 23. American Psychiatric Association, American Psychiatric Association, eds. *Diagnostic*  
670 *and Statistical Manual of Mental Disorders: DSM-5.* 5th ed. American Psychiatric  
671 Association; 2013.
- 672 24. Ulbricht CM, Dumenci L, Rothschild AJ, Lapane KL. Changes in Depression Subtypes  
673 Among Men in STAR\*D: A Latent Transition Analysis. *Am J Mens Health.*  
674 2018;12(1):5-13. doi:10.1177/1557988315607297
- 675 25. Janzing JGE, Birkenhäger TK, van den Broek WW, Breteler LMT, Nolen WA, Verkes  
676 R-J. Psychomotor Retardation and the prognosis of antidepressant treatment in patients  
677 with unipolar Psychotic Depression. *J Psychiatr Res.* 2020;130:321-326.  
678 doi:10.1016/j.jpsychires.2020.07.020
- 679 26. Young KS, Parsons CE, Stein A, Kringelbach ML. Motion and emotion: depression  
680 reduces psychomotor performance and alters affective movements in caregiving  
681 interactions. *Front Behav Neurosci.* 2015;9:26. doi:10.3389/fnbeh.2015.00026
- 682 27. Almeida JRC, Phillips ML. Distinguishing between Unipolar Depression and Bipolar  
683 Depression: Current and Future Clinical and Neuroimaging Perspectives. *Biol*  
684 *Psychiatry.* 2013;73(2):111-118. doi:10.1016/j.biopsych.2012.06.010
- 685 28. Downar J, Daskalakis ZJ. New Targets for rTMS in Depression: A Review of  
686 Convergent Evidence. *Brain Stimulat.* 2013;6(3):231-240.  
687 doi:10.1016/j.brs.2012.08.006
- 688 29. Swann AC, Katz MM, Bowden CL, Berman NG, Stokes PE. Psychomotor performance  
689 and monoamine function in bipolar and unipolar affective disorders. *Biol Psychiatry.*  
690 1999;45(8):979-988. doi:10.1016/S0006-3223(98)00172-3

- 691 30. Werf-Eldering MJ van der, Burger H, Holthausen EAE, Aleman A, Nolen WA.  
692 Cognitive Functioning in Patients with Bipolar Disorder: Association with Depressive  
693 Symptoms and Alcohol Use. *PLOS ONE*. 2010;5(9):e13032.  
694 doi:10.1371/journal.pone.0013032
- 695 31. Sasayama D, Hori H, Teraishi T, et al. More severe impairment of manual dexterity in  
696 bipolar disorder compared to unipolar major depression. *J Affect Disord*.  
697 2012;136(3):1047-1052. doi:10.1016/j.jad.2011.11.031
- 698 32. Snyder HR. Major Depressive Disorder is Associated with Broad Impairments on  
699 Neuropsychological Measures of Executive Function: A Meta-Analysis and Review.  
700 *Psychol Bull*. 2013;139(1):81-132. doi:10.1037/a0028727
- 701 33. Blackburn IM. Mental and Psychomotor Speed in Depression and Mania. *Br J*  
702 *Psychiatry*. 1975;126(4):329-335. doi:10.1192/bjp.126.4.329
- 703 34. Popescu C, Ionescu R, Jipescu I, Popa S. Psychomotor functioning in unipolar and  
704 bipolar affective disorders. *Romanian J Neurol Psychiatry Rev Roum Neurol Psychiatr*.  
705 1991;29(1-2):17-33.
- 706 35. Walker MP, Brakefield T, Morgan A, Hobson JA, Stickgold R. Practice with Sleep  
707 Makes Perfect: Sleep-Dependent Motor Skill Learning. *Neuron*. 2002;35(1):205-211.  
708 doi:10.1016/S0896-6273(02)00746-8
- 709 36. Walker MP, Brakefield T, Seidman J, Morgan A, Hobson JA, Stickgold R. Sleep and  
710 the Time Course of Motor Skill Learning. *Learn Mem*. 2003;10(4):275-284.  
711 doi:10.1101/lm.58503
- 712 37. Dresler M, Kluge M, Genzel L, Schüssler P, Steiger A. Impaired off-line memory  
713 consolidation in depression. *Eur Neuropsychopharmacol*. 2010;20(8):553-561.  
714 doi:10.1016/j.euroneuro.2010.02.002
- 715 38. Dresler M, Kluge M, Pawlowski M, Schüssler P, Steiger A, Genzel L. A double  
716 dissociation of memory impairments in major depression. *J Psychiatr Res*.  
717 2011;45(12):1593-1599. doi:10.1016/j.jpsychires.2011.07.015
- 718 39. Genzel L, Ali E, Dresler M, Steiger A, Tesfaye M. Sleep-dependent memory  
719 consolidation of a new task is inhibited in psychiatric patients. *J Psychiatr Res*.  
720 2011;45(4):555-560. doi:10.1016/j.jpsychires.2010.08.015
- 721 40. Rock PL, Roiser JP, Riedel WJ, Blackwell AD. Cognitive impairment in depression: a  
722 systematic review and meta-analysis. *Psychol Med*. 2014;44(10):2029-2040.  
723 doi:10.1017/S0033291713002535
- 724 41. Roca M, Monzón S, Vives M, et al. Cognitive function after clinical remission in  
725 patients with melancholic and non-melancholic depression: A 6 month follow-up study.  
726 *J Affect Disord*. 2015;171:85-92. doi:10.1016/j.jad.2014.09.018
- 727 42. Herszage J, Dayan E, Sharon H, Censor N. Explaining Individual Differences in Motor  
728 Behavior by Intrinsic Functional Connectivity and Corticospinal Excitability. *Front*  
729 *Neurosci*. 2020;14. doi:10.3389/fnins.2020.00076

- 730 43. Martino M, Magioncalda P, Huang Z, et al. Contrasting variability patterns in the  
731 default mode and sensorimotor networks balance in bipolar depression and mania. *Proc*  
732 *Natl Acad Sci.* 2016;113(17):4824-4829. doi:10.1073/pnas.1517558113
- 733 44. Liu M, Wang Y, Zhang A, et al. Altered dynamic functional connectivity across mood  
734 states in bipolar disorder. *Brain Res.* 2021;1750:147143.  
735 doi:10.1016/j.brainres.2020.147143
- 736 45. Goya-Maldonado R, Brodmann K, Keil M, Trost S, Dechent P, Gruber O.  
737 Differentiating unipolar and bipolar depression by alterations in large-scale brain  
738 networks. *Hum Brain Mapp.* 2016;37(2):808-818. doi:10.1002/hbm.23070
- 739 46. Russo D, Martino M, Magioncalda P, Inglese M, Amore M, Northoff G. Opposing  
740 Changes in the Functional Architecture of Large-Scale Networks in Bipolar Mania and  
741 Depression. *Schizophr Bull.* 2020;46(4):971-980. doi:10.1093/schbul/sbaa004
- 742 47. Kelly AMC, Uddin LQ, Biswal BB, Castellanos FX, Milham MP. Competition between  
743 functional brain networks mediates behavioral variability. *NeuroImage.* 2008;39(1):527-  
744 537. doi:10.1016/j.neuroimage.2007.08.008
- 745 48. Oldfield RC. The assessment and analysis of handedness: the Edinburgh inventory.  
746 *Neuropsychologia.* 1971;9(1):97-113. doi:10.1016/0028-3932(71)90067-4
- 747 49. Uher R, Farmer A, Maier W, et al. Measuring depression: comparison and integration of  
748 three scales in the GENDEP study. *Psychol Med.* 2008;38(2):289-300.  
749 doi:10.1017/S0033291707001730
- 750 50. Milak MS, Keilp J, Parsey RV, Oquendo MA, Malone KM, Mann JJ. Regional brain  
751 metabolic correlates of self-reported depression severity contrasted with clinician  
752 ratings. *J Affect Disord.* 2010;126(1):113-124. doi:10.1016/j.jad.2010.03.002
- 753 51. Phillips ML, Travis MJ, Fagiolini A, Kupfer DJ. Medication Effects in Neuroimaging  
754 Studies of Bipolar Disorder. *Am J Psychiatry.* 2008;165(3):313-320.  
755 doi:10.1176/appi.ajp.2007.07071066
- 756 52. Hassel S, Almeida JR, Kerr N, et al. Elevated striatal and decreased dorsolateral  
757 prefrontal cortical activity in response to emotional stimuli in euthymic bipolar disorder:  
758 no associations with psychotropic medication load. *Bipolar Disord.* 2008;10(8):916-  
759 927. doi:10.1111/j.1399-5618.2008.00641.x
- 760 53. Versace A, Almeida JRC, Hassel S, et al. Elevated Left and Reduced Right  
761 Orbitomedial Prefrontal Fractional Anisotropy in Adults With Bipolar Disorder  
762 Revealed by Tract-Based Spatial Statistics. *Arch Gen Psychiatry.* 2008;65(9):1041-  
763 1052. doi:10.1001/archpsyc.65.9.1041
- 764 54. Almeida JRC, Akkal D, Hassel S, et al. Reduced gray matter volume in ventral  
765 prefrontal cortex but not amygdala in bipolar disorder: significant effects of gender and  
766 trait anxiety. *Psychiatry Res.* 2009;171(1):54-68.  
767 doi:10.1016/j.psychresns.2008.02.001



- 768 55. Hassel S, Almeida JR, Frank E, et al. Prefrontal cortical and striatal activity to happy  
769 and fear faces in bipolar disorder is associated with comorbid substance abuse and  
770 eating disorder. *J Affect Disord.* 2009;118(1-3):19-27. doi:10.1016/j.jad.2009.01.021
- 771 56. Manoach DS, Thakkar KN, Stroynowski E, et al. Reduced overnight consolidation of  
772 procedural learning in chronic medicated schizophrenia is related to specific sleep  
773 stages. *J Psychiatr Res.* 2010;44(2):112. doi:10.1016/j.jpsychires.2009.06.011
- 774 57. Pruijm RHR, Mennes M, van Rooij D, Llera A, Buitelaar JK, Beckmann CF. ICA-  
775 AROMA: A robust ICA-based strategy for removing motion artifacts from fMRI data.  
776 *NeuroImage.* 2015;112:267-277. doi:10.1016/j.neuroimage.2015.02.064
- 777 58. Van Dijk KRA, Sabuncu MR, Buckner RL. The influence of head motion on intrinsic  
778 functional connectivity MRI. *NeuroImage.* 2012;59(1):431-438.  
779 doi:10.1016/j.neuroimage.2011.07.044
- 780 59. Hardwick RM, Rottschy C, Miall RC, Eickhoff SB. A quantitative meta-analysis and  
781 review of motor learning in the human brain. *Neuroimage.* 2013;67:283-297.  
782 doi:10.1016/j.neuroimage.2012.11.020
- 783 60. Beckmann CF, Smith SM. Probabilistic independent component analysis for functional  
784 magnetic resonance imaging. *IEEE Trans Med Imaging.* 2004;23(2):137-152.  
785 doi:10.1109/TMI.2003.822821
- 786 61. Shaw ED, Stokes PE, Mann JJ, Manevitz AZ. Effects of lithium carbonate on the  
787 memory and motor speed of bipolar outpatients. *J Abnorm Psychol.* 1987;96(1):64-69.  
788 doi:10.1037/0021-843X.96.1.64
- 789 62. Shimoyama I, Ninchoji T, Uemura K. The Finger-Tapping Test: A Quantitative  
790 Analysis. *Arch Neurol.* 1990;47(6):681-684.  
791 doi:10.1001/archneur.1990.00530060095025
- 792 63. Calugi S, Cassano GB, Litta A, et al. Does psychomotor retardation define a clinically  
793 relevant phenotype of unipolar depression? *J Affect Disord.* 2011;129(1-3):296-300.  
794 doi:10.1016/j.jad.2010.08.004
- 795 64. Jiménez-Jiménez FJ, Calleja M, Alonso-Navarro H, et al. Influence of age and gender in  
796 motor performance in healthy subjects. *J Neurol Sci.* 2011;302(1):72-80.  
797 doi:10.1016/j.jns.2010.11.021
- 798 65. Prigatano GP, Goncalves CWP, Oliveira SB de, Denucci SM, Pereira RM, Braga LW.  
799 Kinematic recordings while performing a modified version of the Halstead Finger  
800 Tapping Test: Age, sex, and education effects. *J Clin Exp Neuropsychol.* 2020;42(1):42-  
801 54. doi:10.1080/13803395.2019.1665170
- 802 66. Tzourio-Mazoyer N, Landeau B, Papathanassiou D, et al. Automated Anatomical  
803 Labeling of Activations in SPM Using a Macroscopic Anatomical Parcellation of the  
804 MNI MRI Single-Subject Brain. *NeuroImage.* 2002;15(1):273-289.  
805 doi:10.1006/nimg.2001.0978
- 806 67. Arber S. Motor Circuits in Action: Specification, Connectivity, and Function. *Neuron.*  
807 2012;74(6):975-989. doi:10.1016/j.neuron.2012.05.011



- 808 68. Fischer S, Hallschmid M, Elsner AL, Born J. Sleep forms memory for finger skills.  
809 *Proc Natl Acad Sci.* 2002;99(18):11987-11991. doi:10.1073/pnas.182178199
- 810 69. Caligiuri MP, Gentili V, Ebersson S, Kelsoe J, Rapaport M, Gillin JC. A quantitative  
811 neuromotor predictor of antidepressant non-response in patients with major depression.  
812 *J Affect Disord.* 2003;77(2):135-141. doi:10.1016/S0165-0327(02)00107-6
- 813 70. Pruim RHR, Mennes M, Buitelaar JK, Beckmann CF. Evaluation of ICA-AROMA and  
814 alternative strategies for motion artifact removal in resting state fMRI. *NeuroImage.*  
815 2015;112:278-287. doi:10.1016/j.neuroimage.2015.02.063
- 816 71. Hirschfeld RMA, Vornik LA, Lewis L. Perceptions and Impact of Bipolar Disorder:  
817 How Far Have We Really Come? Results of the National Depressive and Manic-  
818 Depressive Association 2000 Survey of Individuals With Bipolar Disorder. *J Clin*  
819 *Psychiatry.* 2003;64(2):161-174.
- 820 72. Fox MD, Snyder AZ, Vincent JL, Corbetta M, Van Essen DC, Raichle ME. The human  
821 brain is intrinsically organized into dynamic, anticorrelated functional networks. *Proc*  
822 *Natl Acad Sci U S A.* 2005;102(27):9673-9678. doi:10.1073/pnas.0504136102
- 823 73. Ghaemi SN, Sachs GS, M. Chiou A, Pandurangi AK, Goodwin FK. Is bipolar disorder  
824 still underdiagnosed? Are antidepressants overutilized? *J Affect Disord.* 1999;52(1):135-  
825 144. doi:10.1016/S0165-0327(98)00076-7
- 826
